# Supplementary material for: Prevalence of virulence and resistance to antibiotics in pathogenic enterococci isolated from mastitic cows
Source: PubMed Central journal article supplement — J Vet Med Sci. 2016 Aug 1;78(11):1663–8. doi: 10.1292/jvms.15-0718 (PMC5138418; doi:10.1292/jvms.15-0718), 2016-08-01
Supplement: jvms-78-1663-s001.pdf [file jvms-78-1663-s001.pdf]

## 动物伦理审查同意书

### Affidavit of Approval of Animal Ethical and Welfare

|                 |                    |
|-----------------|--------------------|
| 编号 Approval No. | GSAU-AEW-2014-0003 |
|-----------------|--------------------|

本《动物实验方案》经过实验动物伦理委员会审核，符合动物保护、动物福利和伦理原则，符合国家实验动物福利伦理的相关规定。方案的相关信息如下：

The animal use protocol listed below has been reviewed and approved by the Animal Ethical and Welfare Committee (AEWC).

|                                     |                                                                                                                                                         |                                   |             |                          |                    |
|-------------------------------------|---------------------------------------------------------------------------------------------------------------------------------------------------------|-----------------------------------|-------------|--------------------------|--------------------|
| 研究名称<br>Protocol Title              | 奶牛乳腺炎来源肠球菌的毒力、抗药性及其致病性的研究<br>Prevalence of virulence profile and antibiotic susceptibility of pathogenic <i>enterococci</i> isolated from mastitic cows |                                   |             |                          |                    |
| 申请人<br>Applicant                    | 武小虎<br>Xiaohu Wu                                                                                                                                        | 职称/学位<br>Title/Degree             | 博士<br>PhD.  | 邮箱<br>Email              | wx.258.h@163.com   |
| 课题负责人<br>Principle Investigator(PI) | 赵兴绪<br>Xingxu Zhao                                                                                                                                      | 职称/学位<br>Title/Degree             | 教授<br>Prof. | 邮箱<br>Email              | zhaoxx@gsau.edu.cn |
| 院系(部门)<br>Department                | 动物医学院<br>College of Veterinary Medicine                                                                                                                 |                                   |             | 申请日期<br>Application date | 2014.03.10         |
| 动物种系<br>Species or Strains          | 小鼠<br>Kunming mice                                                                                                                                      |                                   |             | 动物数量<br>Quantity         | 48                 |
| 计划执行时间<br>Period of Protocol        | 2014.05.01-2015.04.30                                                                                                                                   | 实验动物编号<br>Number of Animal permit |             | No. SCXK (Gan): No       |                    |
| 审查意见<br>Results of inspection       | <input checked="" type="checkbox"/> 符合动物福利伦理要求，可以进行实验 Agree<br><input type="checkbox"/> 调整方案后，可以进行实验 Agree after modify                                 |                                   |             |                          |                    |

甘肃农业大学动物医学院实验动物伦理委员会

Animal Ethical and Welfare Committee of College of

Veterinary Medicine of Gansu Agricultural University

主席 (Chairman):

日期 (Date):

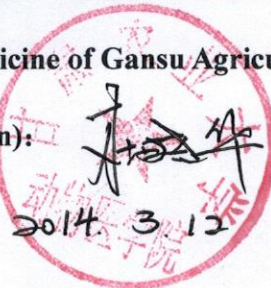

Du Xiaohua

Antimicrobial agents gradients and the standard ranges of each drug\*

| Antimicrobial agents | Antimicrobial resistance assessment standards |              |           |   | Antimicrobial gradients prepared in the 96 well plates (mg/μL) |      |      |    |   |   |     |      |      |      | positive control | quality control |
|----------------------|-----------------------------------------------|--------------|-----------|---|----------------------------------------------------------------|------|------|----|---|---|-----|------|------|------|------------------|-----------------|
|                      | sensitive                                     | intermediate | resistant |   | 1                                                              | 2    | 3    | 4  | 5 | 6 | 7   | 8    | 9    | 10   |                  |                 |
| Pen                  | ≤8                                            | -            | ≥16       | A | 128                                                            | 64   | 32   | 16 | 8 | 4 | 2   | 1    | 0.5  | 0.25 | 0                | 0               |
| Amp                  | ≤8                                            | -            | ≥16       | B | 128                                                            | 64   | 32   | 16 | 8 | 4 | 2   | 1    | 0.5  | 0.25 | 0                | 0               |
| Van                  | ≤4                                            | 8-16         | ≥32       | C | 128                                                            | 64   | 32   | 16 | 8 | 4 | 2   | 1    | 0.5  | 0.25 | 0                | 0               |
| Tet                  | ≤4                                            | 8            | ≥32       | D | 128                                                            | 64   | 32   | 16 | 8 | 4 | 2   | 1    | 0.5  | 0.25 | 0                | 0               |
| Cip                  | ≤1                                            | 2            | ≥4        | E | 32                                                             | 16   | 8    | 4  | 2 | 1 | 0.5 | 0.25 | 0.13 | 0.06 | 0                | 0               |
| Gen                  | 500 mg/μL                                     |              |           | F | 500                                                            | 500  | 5000 |    |   |   |     |      |      |      |                  | 0               |
| Str                  | 1000 mg/μL                                    |              |           | G | 1000                                                           | 1000 | 1000 |    |   |   |     |      |      |      |                  | 0               |

1. For wells of 1 to 12 in column A to column E, antimicrobials were added by doubling dilution method as shown in the corresponding wells. Briefly, firstly added 100 μL of cultural medium were added to well 1 to well 12. Then, 2× antimicrobial agents(2 times concentration for well 1) solution were added to well 1 and mixed well. Pipetting half of the solution to the next well until well 10. Well 11 and well 12 were served as positive and quality control, respectively.

2. 100 μL of 0.5 McFarland turbidity overnight bacteria medium were added to well 1 to well 11, and well 12 was only filled with 100 μL cultural medium. The plates were then mixed well and incubated at 37 °C environment for 18 to 24 hours according to the NCCLS standards\*.

\* Cockerill, F.R., Clinical, Institute, L.S., 2012b. Performance standards for antimicrobial susceptibility testing: twenty-second informational supplement. National Committee for Clinical Laboratory Standards.

Virulence gene detection and 16S rDNA identification of the 60 enterococcal isolates

|           | <i>Esp</i> | <i>GelE</i> | <i>Ccf</i> | <i>CylA</i> | <i>AsaI</i> | <i>Ace</i> | <i>Agg</i> | Virulence count | <i>asaI</i> <sup>+</sup><br><i>ccf</i> <sup>+</sup><br><i>gelE</i> <sup>+</sup> | Identification     |      |
|-----------|------------|-------------|------------|-------------|-------------|------------|------------|-----------------|---------------------------------------------------------------------------------|--------------------|------|
| ATCC51299 | +          | +           | +          | +           | +           | +          | +          | 7               | +++                                                                             | <i>E. faecalis</i> | GVI  |
| ATCC29212 | -          | +           | +          | +           | +           | +          | -          | 5               | +++                                                                             | <i>E. faecalis</i> | GVI  |
| MS4       | -          | +           | -          | -           | +           | +          | -          | 3               |                                                                                 | <i>E. hirae</i>    | GVI  |
| MS5       | -          | +           | +          | -           | +           | -          | -          | 3               | +++                                                                             | <i>E. hirae</i>    | GVI  |
| MS6       | -          | -           | -          | -           | +           | -          | -          | 1               |                                                                                 | <i>E. hirae</i>    | NGVI |
| MS7       | -          | +           | -          | -           | +           | -          | -          | 2               |                                                                                 | <i>E. hirae</i>    | GVI  |
| MS8       | -          | -           | -          | -           | +           | -          | -          | 1               |                                                                                 | <i>E. hirae</i>    | NGVI |
| MS9       | +          | -           | -          | -           | +           | -          | -          | 2               |                                                                                 | <i>E. hirae</i>    | NGVI |
| MS10      | -          | -           | -          | -           | +           | -          | -          | 1               |                                                                                 | <i>E. hirae</i>    | NGVI |
| MS11      | -          | +           | +          | +           | +           | -          | -          | 4               | +++                                                                             | <i>E. hirae</i>    | GVI  |
| MS12      | -          | +           | +          | -           | +           | +          | -          | 4               | +++                                                                             | <i>E. hirae</i>    | GVI  |
| MS13      | -          | +           | +          | -           | +           | -          | -          | 3               | +++                                                                             | <i>E. hirae</i>    | GVI  |
| MS14      | -          | +           | -          | -           | +           | -          | -          | 2               |                                                                                 | <i>E. hirae</i>    | NGVI |
| MS15      | -          | +           | -          | -           | +           | -          | -          | 2               |                                                                                 | <i>E. hirae</i>    | NGVI |
| MS16      | -          | +           | +          | +           | +           | -          | -          | 4               | +++                                                                             | <i>E. hirae</i>    | GVI  |
| MS17      | -          | -           | -          | -           | +           | -          | -          | 1               |                                                                                 | <i>E. hirae</i>    | NGVI |
| MS18      | -          | -           | +          | -           | +           | -          | -          | 2               |                                                                                 | <i>E. hirae</i>    | NGVI |
| MS19      | -          | -           | -          | -           | +           | -          | -          | 1               |                                                                                 | <i>E. hirae</i>    | NGVI |
| MS20      | -          | -           | -          | -           | +           | -          | -          | 1               |                                                                                 | <i>E. hirae</i>    | NGVI |
| MS21      | -          | +           | +          | -           | +           | -          | -          | 3               | +++                                                                             | <i>E. hirae</i>    | GVI  |
| MS22      | -          | +           | +          | -           | +           | -          | -          | 3               | +++                                                                             | <i>E. hirae</i>    | GVI  |
| MS23      | -          | +           | +          | +           | +           | -          | -          | 4               | +++                                                                             | <i>E. hirae</i>    | GVI  |
| MS24      | -          | +           | -          | -           | +           | -          | -          | 2               |                                                                                 | <i>E. hirae</i>    | NGVI |
| MS25      | -          | +           | +          | -           | +           | -          | -          | 3               | +++                                                                             | <i>E. hirae</i>    | GVI  |
| MS26      | +          | +           | +          | -           | +           | +          | -          | 5               | +++                                                                             | <i>E. hirae</i>    | GVI  |
| MS27      | -          | +           | +          | -           | +           | -          | -          | 3               | +++                                                                             | <i>E. hirae</i>    | GVI  |

|      |   |   |   |   |   |   |   |   |     |                   |      |
|------|---|---|---|---|---|---|---|---|-----|-------------------|------|
| MS28 | - | + | + | - | + | - | - | 3 | +++ | <i>E. hirae</i>   | GVI  |
| MS29 | - | + | + | - | + | - | - | 3 | +++ | <i>E. hirae</i>   | GVI  |
| MS30 | - | + | + | - | + | - | - | 3 | +++ | <i>E. hirae</i>   | GVI  |
| MS31 | - | + | + | - | + | - | - | 3 | +++ | <i>E. hirae</i>   | GVI  |
| MS32 | - | + | + | - | + | - | - | 3 | +++ | <i>E. hirae</i>   | GVI  |
| MS33 | - | + | + | - | + | + | - | 4 | +++ | <i>E. hirae</i>   | GVI  |
| MS34 | - | + | - | + | + | - | - | 3 |     | <i>E. hirae</i>   | GVI  |
| MS35 | + | + | + | - | + | + | - | 5 | +++ | <i>E. hirae</i>   | GVI  |
| MS36 | - | + | + | - | + | - | - | 3 | +++ | <i>E. hirae</i>   | GVI  |
| MS37 | - | + | + | - | + | - | - | 3 | +++ | <i>E. hirae</i>   | GVI  |
| MS38 | - | + | + | - | + | + | - | 4 | +++ | <i>E. hirae</i>   | GVI  |
| MS39 | - | + | + | - | + | + | - | 4 | +++ | <i>E. hirae</i>   | GVI  |
| MS40 | + | + | + | - | + | - | - | 4 | +++ | <i>E. hirae</i>   | GVI  |
| MS41 | - | + | + | - | + | + | - | 4 | +++ | <i>E. hirae</i>   | GVI  |
| MS42 | - | + | + | + | + | - | - | 4 | +++ | <i>E. hirae</i>   | GVI  |
| MS43 | - | - | + | - | + | - | - | 2 |     | <i>E. hirae</i>   | NGVI |
| MS44 | - | - | + | - | + | + | - | 3 |     | <i>E. hirae</i>   | GVI  |
| MS45 | - | - | - | - | + | - | - | 1 |     | <i>E. durans</i>  | NGVI |
| MS46 | + | + | - | - | + | + | - | 4 |     | <i>E. durans</i>  | GVI  |
| MS47 | - | + | + | - | + | - | - | 3 | +++ | <i>E. mundtii</i> | GVI  |
| MS48 | - | + | + | - | + | - | - | 3 | +++ | <i>E. mundtii</i> | GVI  |
| MS49 | - | + | - | - | + | - | - | 2 |     | <i>E. faecium</i> | NGVI |
| MS50 | - | - | + | - | + | - | - | 2 |     | <i>E. faecium</i> | NGVI |
| MS51 | - | + | + | - | + | - | - | 3 | +++ | <i>E. faecium</i> | GVI  |
| MS52 | - | + | - | - | + | + | - | 3 |     | <i>E. faecium</i> | GVI  |
| MS53 | - | - | - | - | + | - | - | 1 |     | <i>E. faecium</i> | NGVI |
| MS54 | - | + | + | - | + | - | - | 3 | +++ | <i>E. faecium</i> | GVI  |
| MS55 | - | + | - | - | + | - | - | 2 |     | <i>E. faecium</i> | NGVI |
| MS56 | - | - | - | - | + | - | - | 1 |     | <i>E. faecium</i> | NGVI |

|      |   |   |   |   |   |   |   |   |     |                   |      |
|------|---|---|---|---|---|---|---|---|-----|-------------------|------|
| MS57 | + | + | + | - | + | - | - | 4 | +++ | <i>E. faecium</i> | GVI  |
| MS58 | - | + | + | - | + | - | - | 3 | +++ | <i>E. faecium</i> | GVI  |
| MS59 | - | + | + | - | + | - | - | 3 | +++ | <i>E. faecium</i> | GVI  |
| MS60 | - | + | + | - | + | - | - | 3 | +++ | <i>E. faecium</i> | GVI  |
| MS61 | - | + | - | - | + | - | - | 2 |     | <i>E. faecium</i> | NGVI |
| MS62 | + | + | + | - | + | - | - | 4 | +++ | <i>E. faecium</i> | GVI  |
| MS63 | - | - | + | - | + | - | - | 2 |     | <i>E. faecium</i> | NGVI |

"+++", stands for the isolates was positive to *asa1*, *ccf* and *gelE* positive.

GVI, genetically virulent isolates. NGVI, non-genetically virulent isolates.
